# Supplementary material
Source: MDPI journal article supplement (https://www.mdpi.com/2311-7524/9/2/228)
Supplement: s1 [file s1]

---

**Supplementary data.**

**Exogenous melatonin application induced mor-pho-physiological, and biochemical regulations  
conferring salt tolerance in *Ranunculus asiaticus* L.**

Eman Abdelhakim Eisa, Péter Honfi, Andrea Tilly-Mándy and Iman Mirmazloun

**Table S1.** Klassmann TS3 Baltic peat chemical components

| Substrate<br>type | PH  | EC<br>(cm/mmhos) | Humidity<br>% | OM<br>% | Macroelement<br>(1 kg/m3) | Microelement (mg/kg) |      |      |       |      |      |      |       |       |      |      |      |
|-------------------|-----|------------------|---------------|---------|---------------------------|----------------------|------|------|-------|------|------|------|-------|-------|------|------|------|
|                   |     |                  |               |         | N: P: K                   | Zn                   | Cu   | Cd   | Pb    | Mo   | Ni   | Cr   | Hg    | As    | Co   | Cl   | Na   |
| Peat moss         | 6.0 | 0.4-0.5          | 50-65         | >90     | 14: 10: 18                | 32.45                | 15.6 | 0.42 | 15.28 | 0.10 | 8.75 | 0.70 | <0.01 | 0.112 | 1.11 | <0.2 | <0.1 |
